# Supplementary material
Source: Research Square preprint supplement (doi:10.21203/rs.3.rs-9050779/v1)
Supplement: Supplementary file 1 [file 33839600d2612c96822503a9.xlsx]

## Sheet: Context
Item	Definition	Description
Title	A name or title by which a resource is known	Production and health performance of a selection of polish poultry broiler flocks (Ross308) between 2018 and 2023
Unique identifier	Unique identifier of the dataset. It can be a number (e.g., a digital object identifier (DOI®) that is commonly used to reference journal articles) or a unique text identifier based on the name such as used in some data catalogues, like OpenDataSoft.	https://doi.org/10.5281/zenodo.17406208
Creators	The main researchers involved in producing the data, and/or the authors of the publication, in priority order, including contact details and when relevant their contribution to the data. For instruments collecting data this is the manufacturer or developer of the instrument	Śmiałek, Marcin (Data collector), Delavenne Camille (Contact person - camille.delavenne@epimundi.com), Faverjon Céline (supervisor)
Publisher	The name of the entities that hold, archive, publish, print, distribute, or release the resource	Zenodo
Contributors	The institution or person responsible for managing, distributing, or otherwise contributing to the development of the resource	Same as creators
Publication date	date when the dataset was made available	2025-10-23
Funding reference	Information about financial support (funding) for the resource being registered	DECIDE H2020 project https://cordis.europa.eu/project/id/101000494
Size	Size of the dataset (e.g., bytes, pages, inches, etc) or duration (extent), e.g., hours, minutes, days, etc., of a resource	~3 MB
Version	The version number of the resource.	v1.0
Language	This is the (human) language or languages that the dataset includes. This does not refer to the encoding system used in the data (see “Format” below). While many datasets may be highly quantitative (containing mostly numbers), interpretation of these values requires data dictionaries with text descriptions. Some datasets may also include free text fields recorded in one or more languages.	English
Keywords or subject	Subject, keyword, classification code, or key phrase describing the resource	Broiler, Animal Health, Production performence, Polan, Endemic disease
Format	Technical format of the resource. This refers to the data format and encoding system used to store the data. It could be a simple XML or CSV file, but other formats could be used, such as OWL/RDF, JSON, BSON, PDF, SQLite, or DB files.	csv files
