# Supplementary material
Source: Research Square preprint supplement (doi:10.21203/rs.3.rs-9050779/v1)
Supplement: Supplementary file 2 [file 796bd76860a482205ea0475b.xlsx]

## Sheet: Overview
Item	Label	Description
Unique identifier of the dataset described by the metadata.	Unique identifier of the dataset described by the metadata. If no unique identifier exists, indicate at least the title of the dataset the metadata are refering to.	DOI: XXXXX
Table name and relationships with others	population	Livestock population data
Table name and relationships with others	laboratorytest	Results of laboratory tests performed on the livestock population data collected in the population table
Table name and relationships with others	xxxxxxxxxxxxx	xxxxxxxxxxxxx
Table name and relationships with others	xxxxxxxxxxxxx	xxxxxxxxxxxxx
Table name and relationships with others	xxxxxxxxxxxxx	xxxxxxxxxxxxx
Definition in use in the dataset	Attribute	Variable included in the dataset
Definition in use in the dataset	Data type	Format of variable (character, categories, numeric - integer/decimal) and length or reference to list of values. "fixed categories" means that the tool can only accept as input the list of values defined in the corresponding catalogue. "open categories" means that the tool can accept different values than the one defined in the catalogue (e.g., more categories can be added, names of the categorie…
Change log	2024-07-14	The term "wild pig" in catalogue.SPECIES was replaced by "wild boar". The change has been made for all the data present in the dataset
Change log	2023-01-01	The data from laboratory X were added to the pre existing dataset

## Sheet: Data_quality
Data quality criterion	Data quality sub criterion	Data quality definition	Description
Completeness	Coverage	Completeness of the data at the record level. If there are known to be x units of interest in the population, but the dataset only has data on y units, the coverage is y/x. This may be easy to calculate if reliable data on the population exists.	The data contains 30% of the total number of veterinary clinics available in France
Completeness	Missing data items	Completeness at the column or field level. For any item that is not required, the proportion of records with valid responses should be calculated	Key indications: the veterinarian doing the prescription is indicated in only 5% of the records. For more details see the data summary
Correctness	Invalid value	Data that are not consistent with the others in terms of format or content	The Date of symptoms observed by the farmers have been entered manually and are therefore available in different formats making them difficult to analyse.
Correctness	Incorrect value	Data may have valid values, but those values do not reflect the true state. Estimation of incorrect value is done by comparing data with a known truth.	Unknown
Reliability	External consistency	Extent to which data are compatible or coherent with similar data available outside of the dataset	The data presents a high average number of antimicrobial prescription per veterinarians compared other datasets suggesting that it may contain data related to a specific sub population
Reliability	Internal consistency	Extent to which data are compatible or coherent with similar data available within the dataset. The true value is unknown	Discreprancies are observed between latitute and longitude of the farm and the postcode recorded in the data. It is unclear if these values indicate the same thing or not (for example one may have been used to indicate the house of the farmer and the other the location of the production units)
Reliability	Credibility	Objective and subjective components of the believability of data	The data have been collected by veterinarians specialized in poultry medicine and can therefore be considered as particularly trustworthy for this species.
Quality assurance measures	Feedback system	Presence of feedback systems which provide the data generator with an opportunity to validate the data contained in the dataset	These data are used by veterinarians to invoice their clients. All information related to cost are therefore validated by the client and the veterinarians.
Quality assurance measures	Business rules	Built-in automated data validation steps applied to the data	R1. age of animals should be in a certain range depending on the species, otherwise the system send an error to the veterinarian. Cattle must be 0 day to 40 years old. Poultry must be between 0 day and 15 years
Quality assurance measures	Business rules	Built-in automated data validation steps applied to the data	R2. XXXX add as many business rules as necessary
Quality assurance measures	Business rules	Built-in automated data validation steps applied to the data	R3. XXXX add as many business rules as necessary
Quality assurance measures	Others	Any other data quality assurance measure in place	None

## Sheet: table.population
Table name	Attribute name	Attribute label	Attribute definition	Data type	Catalogue
population	recordId	Record identification code	The unique identifier of the single record, i.e., one measurement of the animals that are present at the subunit level at a given moment	character
population	recordCensusY	Year of census	Year that the information on the subunit was extracted	integer(4)
population	recordCensusM	Month of census	Month that the information on the subunit was extracted	integer(2)
population	recordCensusD	Day of census	Day that the information on the subunit was extracted	integer(2)
population	estabId	Establishment identification code	The official identifier of the establishment where animals are kept as recorded in the national register	character
population	estabType	Type of establishment	The type of establishment, characterised by a specific aim and/or by a specific epidemiological role	open categories	SAMPNT
population	estabPers	Personnel in interaction in the establishment	The number of people at establishment level interacting with the animals (or with the environment in which the animals are located)	integer(3)
population	estabCoordPrecision	Precision of the establishment coordinates	The level of precision associated with the longitude and latitude reported for the establishment. Only needed when estabXCoord and estabYCoord are provided	fixed categories	COORDPRE
population	estabXCoord	Establishment longitude	The longitude of the establishment in World Geodetic System 1984 (WGS84) format. This information is protected by the EU GDPR	decimal
population	estabYCoord	Establishment latitude	The latitude of the establishment in World Geodetic System 1984 (WGS84) format. This information is protected by the EU GDPR	decimal
population	estabMunicipality	Municipality of the establishment	The code of the Local Administrative Units (LAU) as published by Eurostat	character	LAU
population	estabArea	Area of the establishment	The NUTS (Nomenclature of territorial units for statistics) classification as published by Eurostat	fixed categories	NUTS
population	subUnitSpecies	Subunit species	The species of the animals kept and/or bred in the reported subunit	fixed categories	SPECIES

## Sheet: table.laboratorytest
Table name	Attribute name	Attribute label	Attribute definition	Data type	Catalogue
laboratorytest	labId	laboraory ID	The unique identifier of the single laboratory	character
laboratorytest	sampleId	sample ID	The unique identifier of the single sample within a given laboratory	character
laboratorytest	sampleY	Year of sample	Year that the sample was received	integer(4)
laboratorytest	sampleM	Month of sample	Month that the sample was received	integer(2)
laboratorytest	sampleD	Day of sample	Day that the sample was received	integer(2)
laboratorytest	sampleMatrix	Matrix	Matrix of the sample	fixed categories	MATRIX
laboratorytest	patientAge	Age	Age of the animal tested in year	decimal
laboratorytest	ageGroup	Age Group	Age group	open categories	AGEGROUP

## Sheet: catalogue.SAMPNT
Catalogue	Attribute name	Data element	Description data element	Reference
SAMPNT	estabType	Quarantine premises	Establishment where the animals are kept in isolation with no direct or indirect contact with animals outside this epidemiological unit, for the purpose of ensuring that there is no spread of one or more specified diseases while the animals in isolation are undergoing observation for a specified length of time and, if appropriate, testing and treatment [based on Regulation (EU) 2016/429 (AHL), ar…	None
SAMPNT	estabType	Assembly centre	Establishment, approved by the competent authority, where kept terrestrial animals are assembled from more than one farm for a period shorter than the required residency period for the species of animals concerned, for national and international movements	None
SAMPNT	estabType	Market	Establishment, registered by the competent authority, where kept terrestrial animals are assembled from more than one farm for a period shorter than the required residency period for the species of animals concerned, for national movements	None
SAMPNT	estabType	Exhibition	Permanent establishments where animals of domestic or wild species are kept for exhibition to the public for seven or more consecutive days a year (e.g., zoos, petting centres), with the exception of circuses and pet shops	None
SAMPNT	estabType	Show	Temporary events where animals of domestic or wild species are brought together for exhibition to the public for less than seven consecutive days a year	None
SAMPNT	estabType	Farm	Establishment where the animals are kept by humans, since birth or for a rearing/production period or for the required residency period for the species of animals concerned, for production purposes i.e., to breed and/or rear and/or sell animals and/or products of animal origin. Hatcheries are excluded	None
SAMPNT	estabType	Genetic centre	Establishment where the animals are kept by humans, for the collection of germinal products.	None
SAMPNT	estabType	Hatchery	An establishment which incubates and hatches eggs and supplies day-old chicks (art 2, Council Directive 2009/158/EC of 30 November 2009 on animal health conditions governing intra-Community trade in, and imports from third countries of, poultry and hatching eggs).	None
SAMPNT	estabType	Slaughterhouse	Establishment used for slaughtering and dressing animals, the meat of which is intended for human consumption (Regulation (EC) No 853/2004). Slaughtering of hunting game is included. Stalls, pens, covered areas or fields associated with or part of slaughterhouse operations are included.	None
SAMPNT	estabType	Pasture / Co-Pasture	Land used to grow grasses or other herbaceous forage naturally (self-seeded) or through cultivation (sown) and that is not included in the crop rotation of the holding for five years or longer (Commission Regulation (EC) No 796/2004) under the control of a local authority.	None
SAMPNT	estabType	Health and Research Centre	Any permanent, geographically limited and approved establishment where one or more species of animal are habitually: (i) kept for fundamental or applied scientific research (ii) bred for the purposes of such research (iii) kept to undergo veterinary medicine practices such as research laboratories, veterinary hospitals, etc.	None

## Sheet: catalogue.SPECIES
Catalogue	Attribute name	Data element	Description data element	Reference
SPECIES	subUnitSpecies	Swine	Swine are even-toed ungulates of the family Suidae, including pigs, hogs, and boars. The definition is based on Agrovoc definition	http://aims.fao.org/aos/agrovoc/c_7555
SPECIES	subUnitSpecies	Wild boar	Live animals of the taxonomic species Sus scrofa L., Sus scrofa sub. scrofa L. The animals are commonly known as wild boar. The definition is based on Agrovoc definition	http://aims.fao.org/aos/agrovoc/c_24131
SPECIES	subUnitSpecies	Cattle	Live animal of the taxonomic species Bos taurus Bojanus. The animals are commonly known as cattle.	xxx

## Sheet: catalogue.COORDPRE
Catalogue	Attribute name	Data element	Description data element	Reference
COORDPRE	estabCoordPrecision/ subUnitCoordPrecision	Centroid of area	Latitude and longitude of the centroid of the administrative unit	None
COORDPRE	estabCoordPrecision/ subUnitCoordPrecision	Exact location	Exact latitude and longitude	None
COORDPRE	estabCoordPrecision/ subUnitCoordPrecision	Estimated / Near location	Estimated latitude and longitude	None
COORDPRE	estabCoordPrecision/ subUnitCoordPrecision	Unknown	The degree of precision of the coordinates is not known	None

## Sheet: catalogue.AGEGROUP
Catalogue	Attribute name	Data element	Description data element	Reference
AGEGROUP	ageGroup	Juvenile	XXXX	Internal catalogue of the organisation X (not publicly available)
AGEGROUP	ageGroup	Mature	XXXX	Internal catalogue of the organisation X (not publicly available)
AGEGROUP	ageGroup	XXX	XXXX	XXXX
