# Supplementary material
Source: Research Square preprint supplement (doi:10.21203/rs.3.rs-9050779/v1)
Supplement: Supplementary file 3 [file a3380a169dfcd44e7744ac0e.xlsx]

## Sheet: Context
Item	Definition	Description
ID of the associated dataset	Unique identifier of the dataset described by the metadata. If no unique identifier exists, indicate at least the title of the dataset the metadata are refering to.	DOI: XXXXX
Domain	The general domain that the data relates to	Prescriptions done by french poultry veterinarians
Original purpose	This is the purpose for which the dataset was initially established. Specifying the purpose of a dataset is useful to understand why the data were collected and therefore their potential biases. When a dataset has been created based on the integration or analysis of multiple other data sources, it is likely that the original purpose of the integrated dataset could be different from the purpose of…	This dataset is made of an aggregation of multiple datasets extracted from a software used by private veterinary practices in France. The individual datasets are initialy generated by the veterinarians to record their prescription, and invoice their clients. The aggregation of the individual datasets was performed for research purpose in order to study prescription practice of poultry veterinaria…
Scope	This is a definition of what types of data are eligible to be in the dataset, and what types are not.	All the prescription data related to poultry species.
Related documents	Any digital object that might be connected to the data and could be useful for data reuse could be also mentioned in this section	None

## Sheet: Data_resolution
Item	Definition	Description
Subject unit	Subject unit from which individual data items are drawn. This defines what a line is, or in a non-tabular dataset, what defines a unique entry.	Each row of the dataset represents a prescription done by a veterinarian on a certain day. Note that if multiple prescriptions are done on the same date for the same client, they are represented by multiple rows in the data.
Spatial scope	Geographical area covered by the data	France
Spatial resolution	Spatial unit from which individual data items are drawn	The data have been aggregated on a 50km-by-50km grid cell. The shapefile of reference for the grid is available in XXXX.
Temporal resolution	Refers to the precision used to measure when events occurred	Daily records
Period covered	Start date and end date of the data	2020-05-01 to 2023-06-22 (format ISO 8601)
Update frequency and mechanisms	For operational continuously growing datasets and data streams, this item would describe how and when new data is added to the dataset or the components	Not applicable

## Sheet: Quantity_of_data
Item	Definition	Description
Number of unique entries	Number of data or unique entries present in the dataset. For a fixed dataset, the number of records per component (e.g., sheet or table) should be documented. For continuously growing operational datasets, the number of records present at a specified date could be indicated instead.	825496
Number of new records added per update	For operational continuously growing datasets and data streams, it might be useful to provide at least an estimate of the number of new records added per update.	Not applicable

## Sheet: Data_lineage
Item	Definition	Description
Data collection process and method	Describe the data collection process and transcription method used. You can use this item to refer to a flow diagram or any external resource available to help to understand how the data were collecte. If the data are made of a combination of multiple datasets, providing information on the data collection process for each of these datasets would be usefull.	The data collection method is descibed in the paper {DOI}
Data processing steps	Describe the data processing steps implemented (e.g., data cleaning, strategy to handle missing or incorrect data, data anonymization etc). This should also include information about outliers potentially removed from the dataset and the reason why. Like above, you can also refer here to an external document presenting more details about what has been done with the data.	The data processing steps applied to the data are described in the script available on github here {link to repository}
